# Supplementary material
Source: publisher figshare collection journal article supplement (https://sage.figshare.com/ndownloader/files/14510207)
Supplement: Supplementary file 1 [file 14510207]

## Sheet: Studies 3 (Mandela) and 4 (Obam
speaker	date	Mandela life stage: 1 = prison 2 = freed, president	words	raw Hopeful Future	raw Zero-Sum Future	raw Prudence & Caution	raw Others Provoke	raw Perspec-tive of Other	raw Pseudo-Specia-tion	raw Historical Signifi-cance	raw Re-Examina-tion	raw Self Assur-ance	raw total GHC + categor-ies	raw total GHC- categor-ies	raw total net GHC	Total corr net GHC	Total corr GHC + categor-ies	Total corr GHC - categor-ies	raw achieve-ment images	raw affilia-tion images	raw power images	corr achieve-ment images	corr affilia-tion images	corr power images
Mandela	1953-09-21	1	4531	4	3	0	3	4	1	0	1	3	9	10	-1	-0.220702	1.98632	2.20702	12	4	70	2.64842	0.882807	15.4491
Mandela	1961-06-26	1	1330	2	1	0	3	0	1	2	0	0	4	5	-1	-0.75188	3.00752	3.7594	5	3	22	3.7594	2.25564	16.5414
Mandela	1962-02-03	1	4249	1	2	0	4	0	1	0	2	0	3	7	-4	-0.941398	0.706048	1.64745	13	6	60	3.05954	1.4121	14.121
Mandela	1962-10-22	1	2478	0	1	0	5	2	0	0	0	0	2	6	-4	-1.61421	0.807103	2.42131	7	0	23	2.82486	0	9.28168
Mandela	1962-11-07	1	7059	7	0	5	3	1	0	1	0	1	14	4	10	1.41663	1.98328	0.566653	17	10	67	2.40827	1.41663	9.49143
Mandela	1964-04-20	1	10689	13	0	2	2	1	0	0	2	2	18	4	14	1.30976	1.68397	0.374216	46	21	123	4.30349	1.96464	11.5072
Mandela	1980-06-10	1	1025	0	2	0	3	0	2	1	0	0	1	7	-6	-5.85366	0.97561	6.82927	2	2	22	1.95122	1.95122	21.4634
Mandela	1990-02-11	2	1606	4	0	0	0	5	0	2	0	0	11	0	11	6.84932	6.84932	0	8	6	22	4.98132	3.73599	13.6986
Mandela	1994-05-09	2	1081	6	0	2	0	0	0	0	0	0	8	0	8	7.40056	7.40056	0	12	3	12	11.1008	2.77521	11.1008
Mandela	1994-05-10	2	883	6	0	0	0	0	0	2	0	0	8	0	8	9.06002	9.06002	0	9	8	6	10.1925	9.06002	6.79502
Mandela	1999-03-26	2	1877	7	0	0	0	2	0	5	0	0	14	0	14	7.45871	7.45871	0	17	5	18	9.05701	2.66383	9.58977
Obama	2013-09-10		2189	0	0	6	0	3	0	1	0	0	10	0	10	4.5683	4.5683	0	6	3	34	2.74098	1.37049	15.5322
Obama	2014-09-10		1998	4	2	3	3	0	0	0	0	0	7	5	2	1.001	3.5035	2.5025	18	8	40	9.00901	4.004	20.02
